# Supplementary material
Source: PubMed Central journal article supplement (PMC4284532)
Supplement: pnas.201420131SI.pdf [file pnas.201420131SI.pdf]

# Supporting Information

Mayoral et al. 10.1073/pnas.1420131112

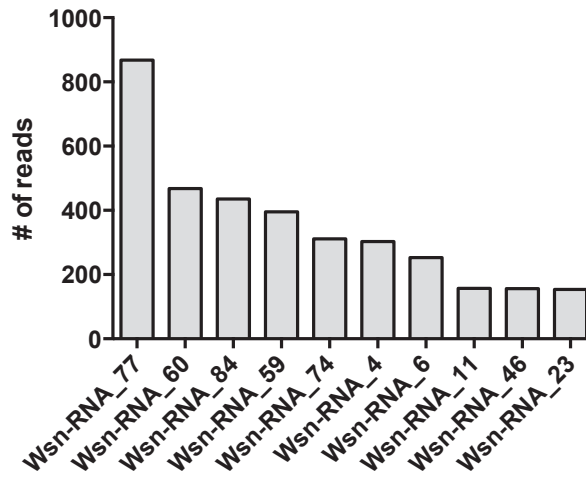

Fig. S1. Ten most abundant *WsnRNAs* from deep sequencing of small RNAs from Aag2 cells infected with *Wolbachia-wMelPop-CLA*.

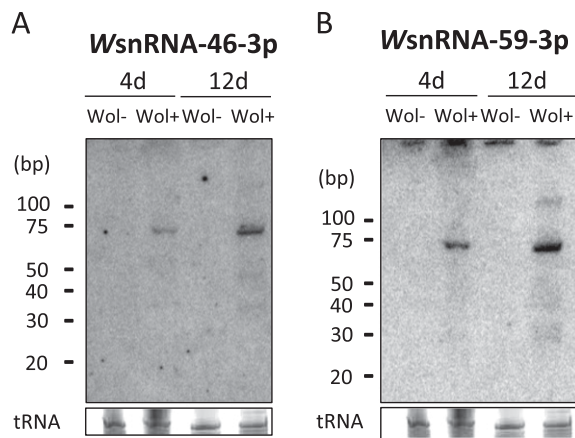

Fig. S2. The antisense mature *WsnRNA-46-3p* and *WsnRNA-59-3p* are not detected in adult mosquitoes. *WsnRNA-46-3p* (A) and *WsnRNA-59-3p* (B) after Northern blotting from 4- and 12-d-old *A. aegypti* mosquitoes with *Wolbachia-wMelPop-CLA* (Wol<sup>+</sup>) and without (Wol<sup>-</sup>). tRNA is shown as loading control.



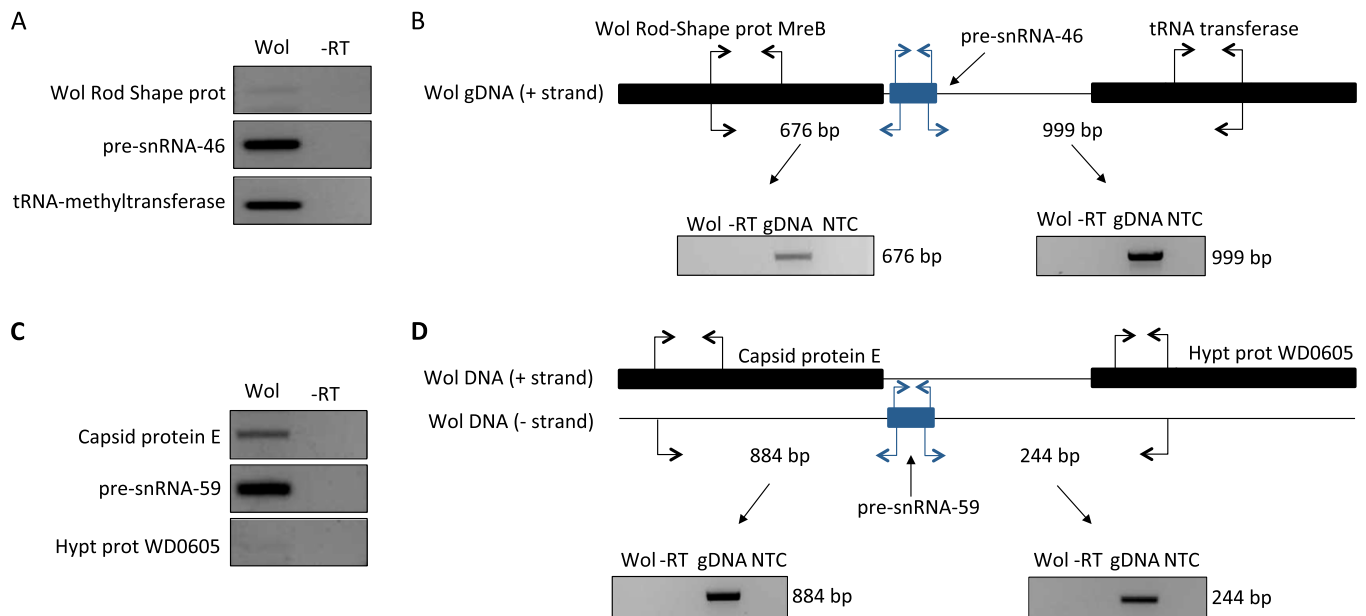

**Fig. S5.** *WsnRNAs* are transcribed independent of the flanking genes. (A) RT-PCR analysis of expression of pre*WsnRNA-46* and the flanking genes *Wolbachia* Rod-Shape protein *MreB* and tRNA-methyltransferase. (B) RT-PCR using internal primers of the rod-shape protein *MreB* and pre*WsnRNA-46* or tRNA-methyltransferase and pre*WsnRNA-46*. Genomic DNA was included as positive control. (C) RT-PCR analysis of expression of pre*WsnRNA-59* and the flanking genes Capsid protein E and hypothetical protein WD0605. (D) RT-PCR using internal primers of the Capsid protein E and pre*WsnRNA-59* or hypothetical protein WD0605 and pre*WsnRNA-59*. Genomic DNA was included as positive control.

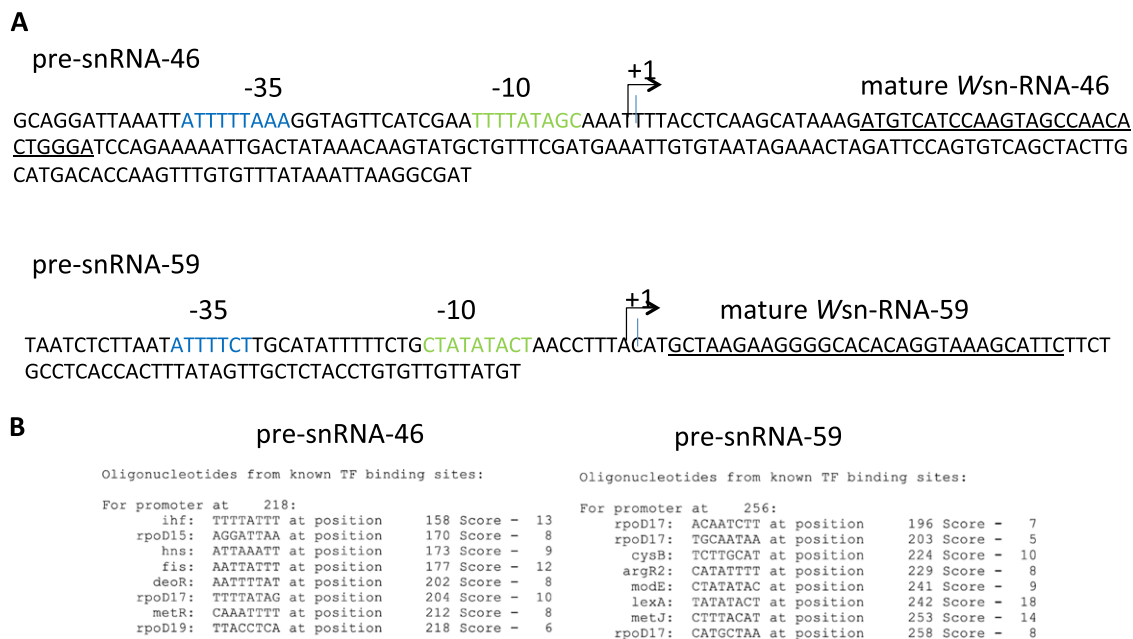

**Fig. S6.** TATA box, initiation transcription site, and transcription factors prediction upstream of pre*WsnRNAs-46* (A) and pre*WsnRNA-59* (B).

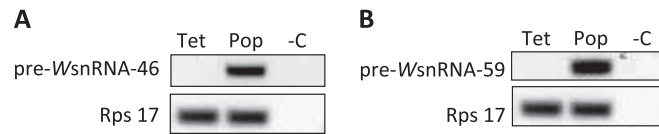

**Fig. S7.** preWsnRNAs are transcribed from the *Wolbachia* genome. PCR amplification of preWsnRNA-46 (A) and preWsnRNA-59 (B) from genomic DNA extracted from Tet and Pop mosquitoes. -C, negative control. Rps17 is shown as control.

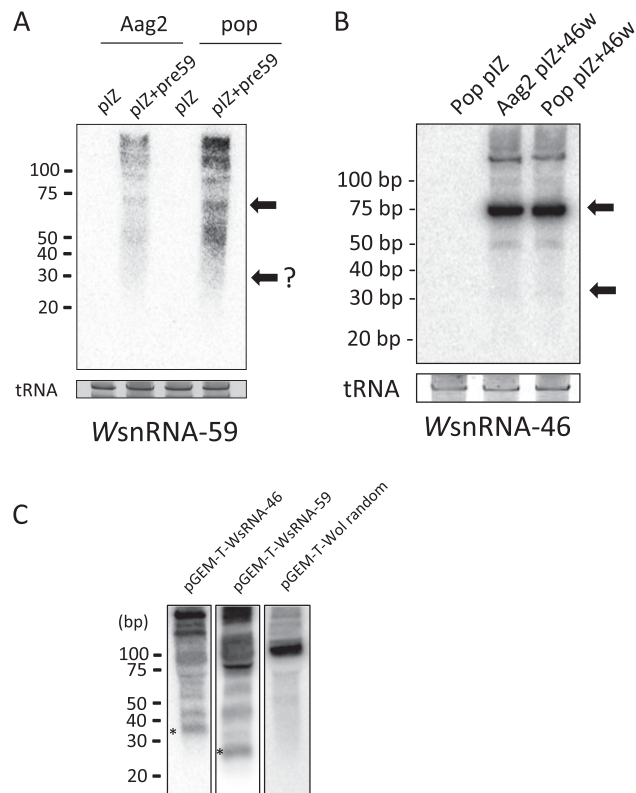

**Fig. S8.** preWsnRNAs sequences are recognized, transcribed, and sliced by the prokaryotic machinery of *E. coli*. Northern blot analysis of WsnRNA-46 (A) and WsnRNA-59 (B) 3 d after the transfection of the piZ/V5 constructs containing preWsnRNAs into Aag2 and Pop cells. (C) Northern blot analysis of WsnRNA-46 and WsnRNA-59 after overnight expression in *E. coli* transformed with preWsnRNA-46 and preWsnRNA-59 using pGEM-T-Easy.

# A *Wol* Carbamoyl-phosphatase synthase (*carA*)

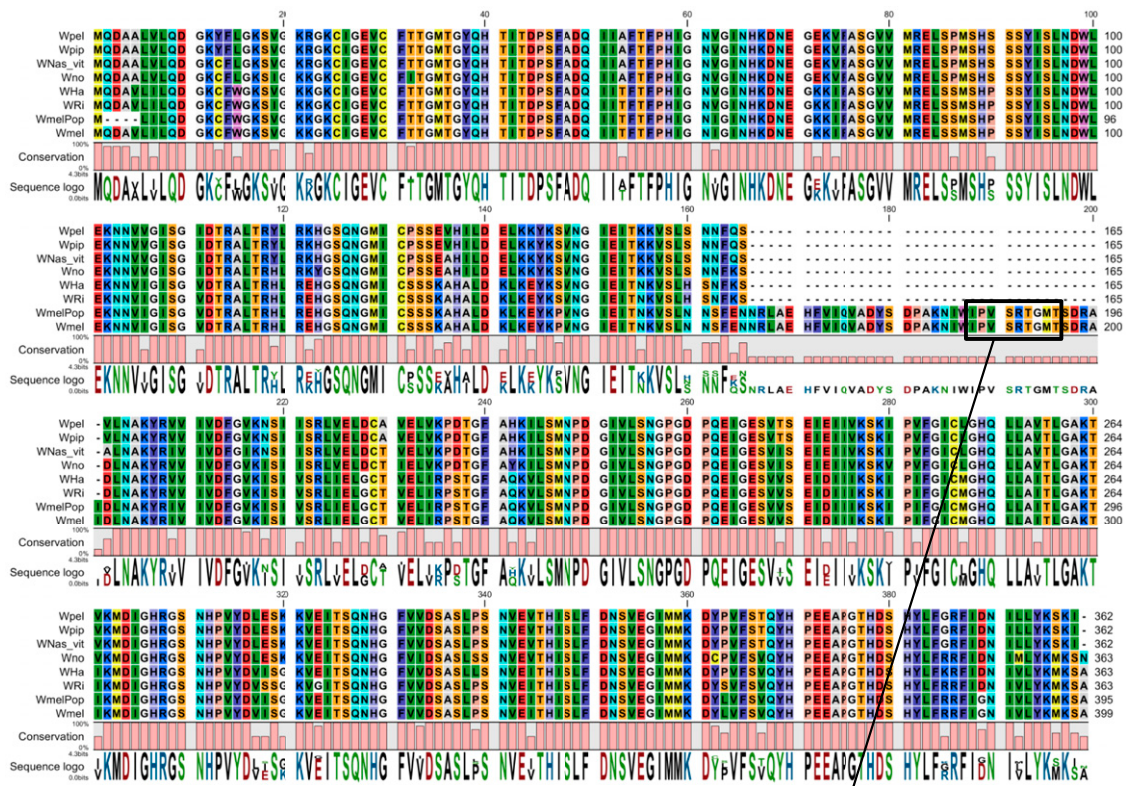

# B

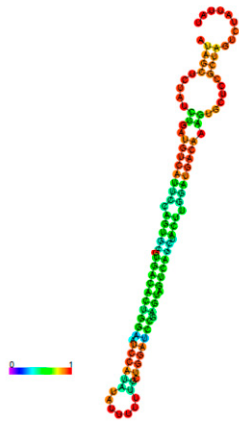

Target sequence of WsnRNA-46

|                     |                   |
|---------------------|-------------------|
| mfe: -31.6 kcal/mol |                   |
| p-value: undefined  |                   |
| position 562        |                   |
| target 5' A         | CAC A C 3'        |
| UUCCAGUGU           | GC AC UGGA UGACAU |
| AGGGUCACA           | CG UG ACCU ACUGUA |
| miRNA 3'            | AC A A 5'         |

Predicted secondary structure of the 109 bp *Wolbachia* Palindromic Element (WPE) inserted in the Carbamoyl-phosphatase synthase (*carA*) gene

Fig. S9. (Continued)





# E *Wol* UDP-N-acetylmuramoylalanine--D-glutamate ligase (*muR D*)

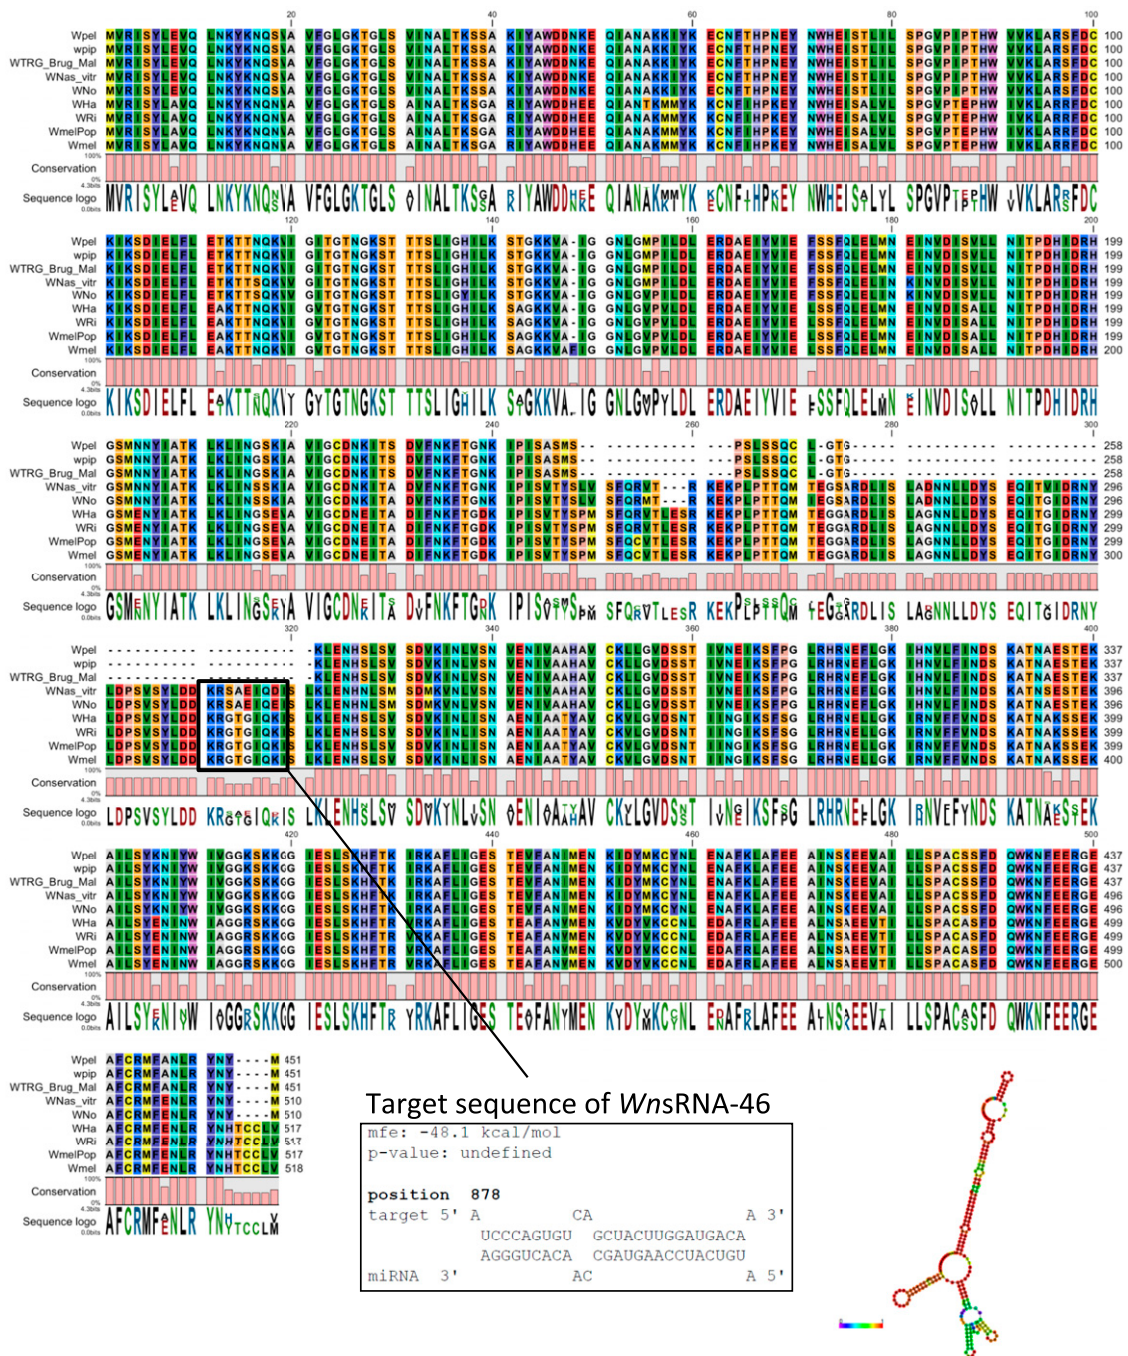

Fig. S9. (Continued)



# F Wol Glycerinaldehyde 3-phosphatase dehydrogenase (*Gpdh\_C*)

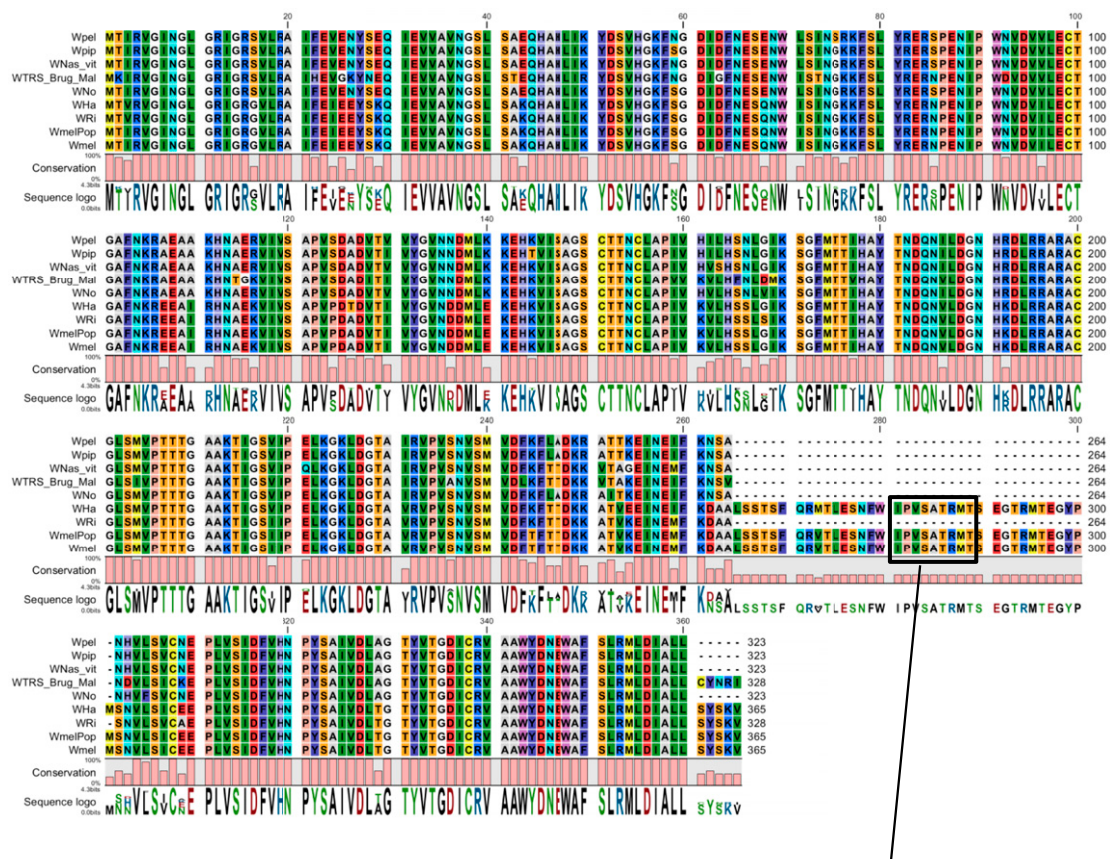

Target sequence of *WnsRNA-46*

```
mfe: -44.1 kcal/mol
p-value: undefined

position 841
target 5' A CA C C 3'
        UCCAGUGU GCUACU GGAUGACAU
        AGGGUCACA CGAUGA CCUACUGUA
miRNA 3' AC A 5'
```

**Fig. S9.** *WnsRNA-46* targets inserted palindromic sequences in *Wolbachia* target genes. (A) Alignment of the *Wolbachia* gene carbamoyl-phosphatase (*carA*) in different *Wolbachia* strains and its putative targeted sequence. (B) Secondary structure prediction of the palindromic sequences inserted in the *carA* gene by using RNAfold. (C) Alignment of the *Wolbachia* gene Geranyltransferase (*IspB*) in different *Wolbachia* strains and its putative targeted sequence. (D) Alignment of the *Wolbachia* gene UDP-*N*-acetylmuramoylalanine-*D*-glutamate ligase (*murD*) and its putative targeted sequence. (E) Alignment of the *Wolbachia* gene tRNA modification GTPase (*TrmE*) in different *Wolbachia* strains and its putative targeted sequence. (F) Alignment of the *Wolbachia* gene Glycerinaldehyde 3-phosphatase dehydrogenase (*Gpdh\_C*) in different *Wolbachia* strains and its putative targeted sequence.

**Table S1.** Sequence identity of pre*WnsRNA-46* and pre*WnsRNA-59* in different strains of *Wolbachia*

|                             | wAlbB | wAna            | wBm | wBol1 | wMel | wMelPop | wMelPopCLA | wMelCS | wOo | wOv | wPip | wRi             | wUni | wVitB | wWil |
|-----------------------------|-------|-----------------|-----|-------|------|---------|------------|--------|-----|-----|------|-----------------|------|-------|------|
| pre <i>miRNA59</i> , %      | No    | 100             | *   | ‡     | 100  | 100     | 100        | 100    | No  | *   | *    | 100             | *    | *     | *    |
| pre <i>miRNA46</i> , %      | No    | 88 <sup>‡</sup> | †   | †     | 100  | 100     | 100        | 100    | No  | *   | †    | 88 <sup>‡</sup> | †    | †     | 100  |
| <i>Wolbachia</i> supergroup | B     | A               | D   | B     | A    | A       | A          | A      | C   | C   | B    | A               | A    | A     | A    |

wAlbB, *Aedes albopictus*; wAna, *Drosophila ananassae*; wBm, *Brugia malayi*; wBol1, *Hypolimnas bolina*; wMel, *Drosophila melanogaster*; wMelPop, *Drosophila melanogaster*; wMelPopCLA, *Drosophila melanogaster*; wMelCS, *Drosophila melanogaster*; wOo, *Onchocerca ochengi*; wOv, *Onchocerca volvulus*; wPip, *Culex quinquefasciatus* Pel; wRi, *Drosophila simulans*; wUni, *Muscidifurax uniraptor*; wVitB, *Nasonia vitripennis*; wWil, *Drosophila willistoni*.

\*Just very small fragment homology.

†Homology to less than half the sequence.

‡High homology to more than half the sequence.

**Table S2. Target prediction for *WsnRNA-46* and *WsnRNA-59* in *Wolbachia* strain *wMelPop* genome using NCBI blast and RNAhybrid for predictions**

| <i>WsnRNA</i>    | Potential target genes in <i>Wolbachia</i>                       | Region | RNAhybrid                                                                                                                                       | Mfe, kcal/mol |
|------------------|------------------------------------------------------------------|--------|-------------------------------------------------------------------------------------------------------------------------------------------------|---------------|
| <i>WsnRNA-46</i> | UDP- <i>N</i> -acetylmuramoylalanine- <i>D</i> -glutamate ligase | CDS    | Position 878<br>target 5' A CA A 3'<br>UCCCAGUGU GCUACUUGGAUGACA<br>AGGGUCACA CGAUGAACCUACUGU<br>miRNA 3' AC A 5'                               | -48.1         |
|                  | Hypothetical protein gb AE017196.1 :227855-228025                | CDS    | Position 17<br>target 5' A CA A 3'<br>UCCCAGUGU GCUACUUGGAUGACA<br>AGGGUCACA CGAUGAACCUACUGU<br>miRNA 3' AC A 5'                                | -48.1         |
|                  | Hypothetical protein gb AE017196.1 :395766-396101                | CDS    | Position 266<br>target 5' A A C C 3'<br>UCCCAGUGUU GCUACUUG AUGACA<br>AGGGUCACAA CGAUGAAC UACUGU<br>miRNA 3' C C A 5'                           | -43.5         |
|                  | Glyceraldehyde 3-phosphate dehydrogenase                         | CDS    | Position 841<br>target 5' A CA C C 3'<br>UCCCAGUGU GCUACU GGAUGACAU<br>AGGGUCACA CGAUGA CCUACUGUA<br>miRNA 3' AC A 5'                           | -44.1         |
|                  | Carbamoyl-phosphate synthase, small subunit                      | CDS    | Position 658<br>target 5' A G A CA A 3'<br>UCC AGU GU GCUACUUGGAUGACA<br>AGG UCA CA CGAUGAACCUACUGU<br>miRNA 3' G AC A 5'                       | -39.9         |
|                  | Geranyltranstransferase                                          | CDS    | Position 581<br>target 5' A CA C C 3'<br>UCCAGUGU GCUACUUG AUGACA<br>AGGGUCACA CGAUGAAC UACUGU<br>miRNA 3' AC C A 5'                            | -38.1         |
|                  | tRNA modification GTPase TrmE                                    | CDS    | Position 1117<br>target 5' A CA C C 3'<br>UCCAGUGU GCUACUUG AUGACAU<br>AGGGUCACA CGAUGAAC UACUGUA<br>miRNA 3' AC C 5'                           | -38.5         |
| <i>WsnRNA-59</i> | Isoleucyl-tRNAs                                                  | CDS    | Position 1092<br>target 5' A CG ACUG G CAUAC GGA G 3'<br>GA GU GC UUGUG UGCUCCU UUUGGU<br>CU CG UG GACAC ACGGGGA GAAUCG<br>miRNA 3' UA AAA A 5' | -27.1         |
|                  | Prophage LambdaW4                                                | CDS    | Position 344<br>target 5' A ACAUACA G ACA G 3'<br>GAAUGCUIUACU CC UU CUUAGC<br>CUUACGAAAUGG GG AA GAAUCG<br>miRNA 3' ACACACG G 5'               | -30.6         |
|                  | ATP-dependent Clp protease, ATP-binding subunit ClpX             | CDS    | Position 854<br>target 5' A A A UCAA G 3'<br>GAAUGCUIUAC UG UGU CCU<br>CUUACGAAAUG AC ACA GGA<br>miRNA 3' G CGG AGAAUCG 5'                      | -25.5         |
|                  | Ankyrin domain protein (WD0596)                                  | CDS    | Position 344<br>target 5' A ACAUACA G ACA G 3'<br>GAAUGCUIUACU CC UU CUUAGC<br>CUUACGAAAUGG GG AA GAAUCG<br>miRNA 3' ACACACG G 5'               | -30.6         |

Mfe, minimum free energy.

**Table S3. Target prediction for WsnRNA-46 and WsnRNA-59 in *A. aegypti* using NCBI blast and RNAhybrid for predictions**

| WsnRNA    | Potential target genes in <i>A. aegypti</i>                                               | Region                               | RNAhybrid                                                                                                                                  | Mfe, kcal/mol                                                                                                                      |       |
|-----------|-------------------------------------------------------------------------------------------|--------------------------------------|--------------------------------------------------------------------------------------------------------------------------------------------|------------------------------------------------------------------------------------------------------------------------------------|-------|
| WsnRNA-46 | Dynein heavy chain AAEL007225-RA                                                          | CDS                                  | Position 3662<br>target 5' U A C GAC CAAAG U 3'<br>UCU AGU G GCU ACUUGGAUGACAU<br>AGG UCA C CGA UGAACCUACUGUA<br>miRNA 3' G AAC 5'         | -30.3                                                                                                                              |       |
|           | AMP-dependent ligase AAEL006823-RA                                                        | CDS                                  | Position 1261<br>target 5' A CGACAUC G A 3'<br>CCGG GGCUACUUGGAUGA G<br>GGUC CCGAUGAACCUACU U<br>miRNA 3' AG ACAA G A 5'                   | -35.3                                                                                                                              |       |
|           | Zinc finger proteína AAEL013028-RA                                                        | CDS                                  | Position 928<br>target 5' C AU A A G G A UG C 3'<br>UCCCAGU G UG CU G UUGGA UG GU<br>AGGGUCA C AC GA U AACCU AC UA<br>miRNA 3' A C G UG 5' | -26.2                                                                                                                              |       |
|           | Hypothetical protein AAEL009280-RA                                                        | CDS                                  | Position 959<br>target 5' A CAGCA AUCAGA G 3'<br>UUCAGU GUUGG ACUUGGAUGACAU<br>GGGUCA CAACC UGAACCUACUGUA<br>miRNA 3' A GA 5'              | -35.6                                                                                                                              |       |
|           | Swiprosin AAEL006006-RA                                                                   | CDS                                  | Position 178<br>target 5' G AAAC A UC G 3'<br>UCGG G UGGCUACUUGGA UGGCG<br>GGUC C ACCGAUGAACCU ACUGU<br>miRNA 3' AG A A A 5'               | -33.2                                                                                                                              |       |
|           | Selenoprotein G AAEL005523-RA                                                             | CDS                                  | Position 125<br>target 5' A AUU CCGACCGAUCUC A 3'<br>CUCGGU GUU GGCUACUUGGAUGG<br>GGGUCA CAA CCGAUGAACCUACU<br>miRNA 3' A GUA 5'           | -34.5                                                                                                                              |       |
|           | Farnesyltransferase alpha subunit/rab geranylgeranyl transferase alpha subunit AAEL000421 | CDS                                  | Position 4<br>target 5' A CGACGGA C A A 3'<br>CCU AG UG UGG CUACUUGGAUGAUA<br>GGG UC AC ACC GAUGAACCUACUGU<br>miRNA 3' A A A 5'            | -33.9                                                                                                                              |       |
|           | Rreceptor protein tyrosine phosphatase AAEL013105-RA                                      | CDS                                  | Position 1168<br>target 5' U A C CGUACUA C 3'<br>UCC CG UG CUACUUGGAUGAU<br>AGG GU AC GAUGAACCUACUG<br>miRNA 3' C AACC UA 5'               | -27.4                                                                                                                              |       |
|           | Inositol 1,4,5-trisphosphate receptor AAEL003608-RA                                       | CDS                                  | Position 2396<br>target 5' A UUAC G C 3'<br>UAGU UGGC UUGGAUGACAU<br>GUCA ACCG AACCUACUGUA<br>miRNA 3' AGG CA AUG 5'                       | -29.1                                                                                                                              |       |
|           | ATP-dependent Clp protease, ATP-binding subunit ClpX                                      | CDS                                  | Position 854<br>target 5' A A A UCAA G 3'<br>GAAUGCUIUAC UG UGU CCU<br>CUUACGAAAUG AC ACA GGA<br>miRNA 3' G CGG AGAAUCG 5'                 | -25.5                                                                                                                              |       |
|           | WsnRNA-59                                                                                 | Hypothetical proteína AAEL000859     | CDS                                                                                                                                        | Position 456<br>target 5' C ACUGGG GCUU U C 3'<br>UGCU GCC UGUGCCCUUCUU GC<br>ACGA UGG ACACGGGGAAGAA CG<br>miRNA 3' CUU AA AC U 5' | -39.3 |
|           |                                                                                           | Serine protease inhibitor AAEL011777 | CDS                                                                                                                                        | Position 923<br>target 5' C GGAAAG AUG G 3'<br>GC GUGUGCCCUUC AG<br>CG CACACGGGGAAG UC<br>miRNA 3' CUUA AAAUGGA AA G 5'            | -33.7 |
